# Supplementary material
Source: PubMed Central journal article supplement (PMC3603390)

**Figure S1.** NMDS plots representing the Bray-Curtis similarity of sulfate reducing bacterial communities (based on *dsrAB* T-RFLP profiles) in the sediments (a) at the end of the short-term experiment and (b) at the end of the long-term experiment.

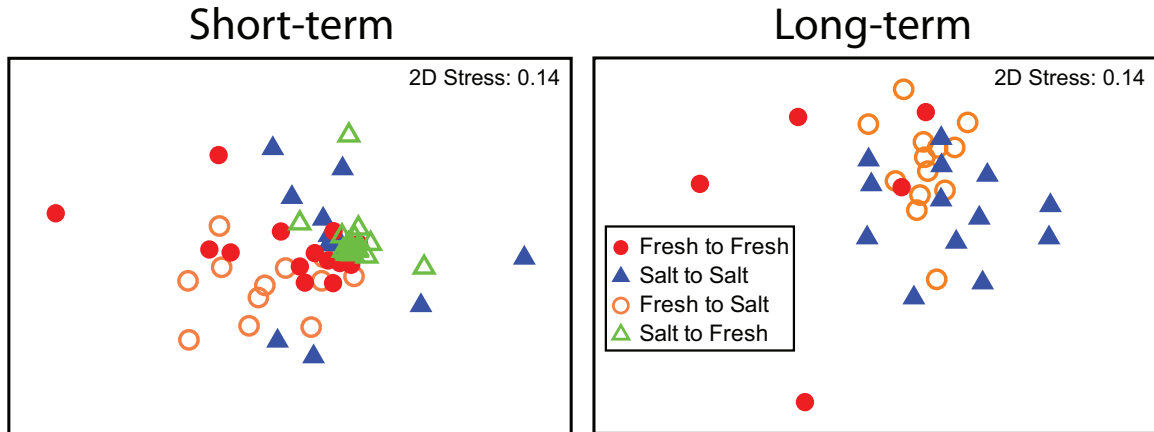

Supplement: ismej2012154x1.pdf [file ismej2012154x1.pdf]
