# Supplementary material
Source: PubMed Central journal article supplement (PMC3603390)

**Figure S2.** NMDS plot of overall functional similarity in the sediments (a) at the end of the short-term experiment and (b) at the end of the long-term experiment.

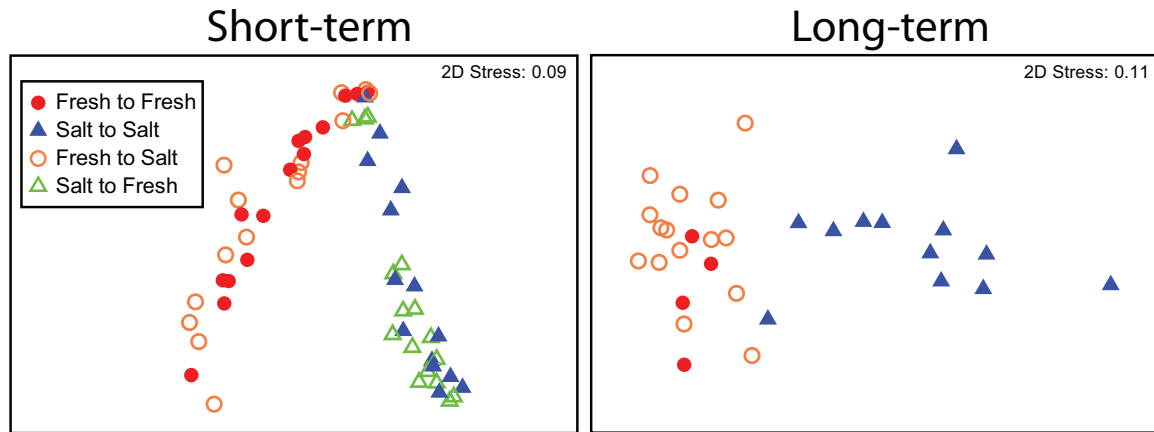

Supplement: ismej2012154x2.pdf [file ismej2012154x2.pdf]
