# Supplementary material
Source: PubMed Central journal article supplement (PMC3603390)

**Figure S3.** Means ( $\pm 1$  standard error) of (a) salinity and (b) ammonium at the end of the long-term experiment.

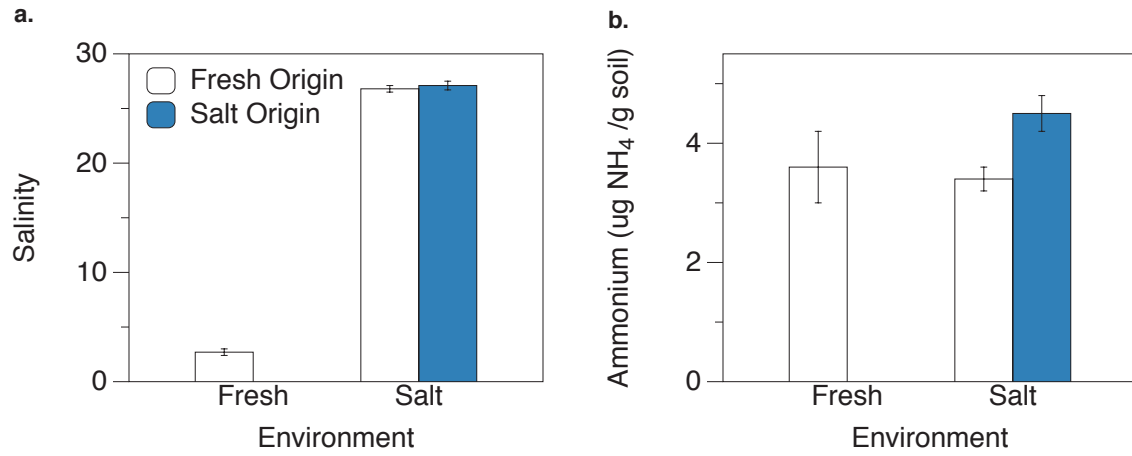

Supplement: ismej2012154x3.pdf [file ismej2012154x3.pdf]
